# Supplementary material for: Profile of blood cells and inflammatory mediators in periodic fever, aphthous stomatitis, pharyngitis and adenitis (PFAPA) syndrome
Source: Springer Nature journal article supplement (doi:10.1186/1471-2431-10-65), 2010-09-06
Supplement: Additional file 4 [file 1471-2431-10-65-s4.pdf]

**Table S3.** Concentration of inflammatory mediators in serum

| Analyte                          | <sup>e</sup> Range (pg/ml) | <sup>f,g</sup> SD | <sup>a</sup> control |                |           | <sup>b</sup> afebrile (AF) |           |                | <sup>c</sup> febrile (F) |           |           |
|----------------------------------|----------------------------|-------------------|----------------------|----------------|-----------|----------------------------|-----------|----------------|--------------------------|-----------|-----------|
|                                  |                            |                   | <sup>d</sup> C04     | C05            | C08       | P03                        | P04       | P05            | P05                      | P09       | P10       |
| <b>Classic pro-inflammatory</b>  |                            |                   |                      |                |           |                            |           |                |                          |           |           |
| IL1 $\beta$                      | 18 - 12810                 |                   | 45                   | <i>12</i>      | 47        | 32                         | <i>24</i> | <sup>h</sup> < | <                        | <         | <i>14</i> |
| IL1Ra                            | 42 - 30900                 |                   | 1085                 | 683            | 941       | 758                        | 372       | 452            | 1587                     | 702       | 1806      |
| TNF $\alpha$                     | 8 - 5600                   | *                 | 23                   | 19             | 23        | 17                         | 19        | 18             | <i>14</i>                | 18        | 18        |
| IL6                              | 10 - 6900                  | **                | <i>11</i>            | 7              | 23        | 9                          | <i>6</i>  | <i>17</i>      | 64                       | 35        | 44        |
| <b>Growth stimulators</b>        |                            |                   |                      |                |           |                            |           |                |                          |           |           |
| GMCSF                            | 28 - 20590                 |                   | 61                   | <i>18</i>      | 27        | <                          | <         | 72             | 167                      | <         | 49        |
| IL2                              | 9 - 6430                   |                   | 30                   | <i>12</i>      | 21        | 19                         | <i>13</i> | 8              | <i>13</i>                | <i>12</i> | 25        |
| IL2R                             | 34 - 24660                 |                   | 1159                 | 1159           | 1257      | 810                        | 1126      | 2030           | 1451                     | 1233      | 1216      |
| IL7                              | 18 - 13070                 | **                | 67                   | 52             | 62        | 32                         | <i>34</i> | 32             | <i>19</i>                | 43        | 29        |
| <b>T<sub>H</sub>1-associated</b> |                            |                   |                      |                |           |                            |           |                |                          |           |           |
| IFN $\gamma$                     | 17 - 12700                 | *                 | 143                  | 103            | 125       | 96                         | 91        | 94             | 80                       | 99        | 88        |
| IFN $\alpha$                     | 10 - 7750                  |                   | 116                  | 92             | 116       | 83                         | 89        | 86             | 86                       | 89        | 125       |
| IL12p40p70                       | 14 - 10500                 |                   | 1409                 | 1564           | 1505      | 1367                       | 1402      | 1118           | 1052                     | 1393      | 1434      |
| <b>T<sub>H</sub>2-associated</b> |                            |                   |                      |                |           |                            |           |                |                          |           |           |
| IL4                              | 10 - 7580                  |                   | 222                  | 214            | 213       | 182                        | 227       | 191            | 194                      | 204       | 192       |
| IL5                              | 33 - 24170                 |                   | <i>11</i>            | 7              | <i>12</i> | 7                          | 7         | 6              | 5                        | 7         | 7         |
| IL10                             | 19 - 13910                 |                   | 8                    | 4              | 6         | 5                          | 3         | <i>10</i>      | 35                       | 5         | 6         |
| IL13                             | 15 - 10850                 | *                 | 43                   | <i>18</i>      | 47        | 12                         | <         | <              | <                        | <i>1</i>  | <         |
| IL15                             | 26 - 18670                 |                   | 49                   | <i>17</i>      | 33        | 25                         | 6         | 5              | <i>14</i>                | 8         | 75        |
| <b>T<sub>H</sub>17</b>           |                            |                   |                      |                |           |                            |           |                |                          |           |           |
| IL17                             | 33 - 23720                 | *                 | 199                  | 177            | 206       | 166                        | 143       | 155            | 147                      | 162       | 166       |
| <b>Chemotactic</b>               |                            |                   |                      |                |           |                            |           |                |                          |           |           |
| CCL2/MCP1                        | 17 - 12180                 |                   | 715                  | 746            | 708       | 1055                       | 606       | 754            | 979                      | 507       | 777       |
| CCL3/MIP1 $\alpha$               | 12 - 8440                  |                   | 128                  | 105            | 118       | 97                         | 112       | 101            | 125                      | 103       | 127       |
| CCL4/MIP1 $\beta$                | 16 - 11830                 | *                 | 176                  | 138            | 145       | 124                        | 129       | 136            | 201                      | 174       | 162       |
| CCL5/RANTES                      | 11 - 8380                  |                   | >                    | <sup>i</sup> > | >         | >                          | >         | >              | 23558                    | >         | 81711     |
| CCL11/Eotaxin                    | 6 - 4430                   | *                 | 226                  | 156            | 136       | 210                        | 193       | 190            | 141                      | 106       | 49        |
| CXCL8/IL8                        | 7 - 5080                   |                   | 67                   | 12             | 17        | 7                          | 22        | 14             | 38                       | 20        | <         |
| CXCL9/MIG                        | 4 - 2890                   |                   | 113                  | 91             | 105       | 108                        | 77        | 110            | 1078                     | 94        | 256       |
| CXCL10/IP10                      | 3 - 2540                   |                   | 40                   | 87             | 64        | 53                         | 63        | 110            | 633                      | 107       | 243       |

Select data shown in Figure 3 and Figure 4

<sup>a-d</sup>Concentration of inflammatory mediators in sera from <sup>a</sup>healthy children (control), PFAPA children in an <sup>b</sup>afebrile interval (AF) or <sup>c</sup>~15 hours after fever commenced (F). Numerical digits in the assigned <sup>d</sup>identification number (ID) are unique to individuals.

<sup>e</sup>Lower and upper limits of detection (pg/ml) for each analyte as reported by the manufacturer.

<sup>f</sup>SD, a statistical difference in analyte concentration between the groups was determined by one-way ANOVA with a *p*-value < 0.05 (\*), < 0.01 (\*\*) and < 0.001 (\*\*\*).

<sup>g</sup>Values in italics were extrapolated beyond the standard range (StarStation software) and excluded from statistical analysis.

<sup>h,i</sup>< and > indicate a concentration of the analyte below or above the detectable range.
